# Supplementary material
Source: PubMed Central journal article supplement (PMC6608598)
Supplement: NIHMS1527690-supplement-1.pdf [file NIHMS1527690-supplement-1.pdf]

**Supplementary Table 1.** Main effect of body composition measurements for risk of any colorectal neoplasia and high-risk adenoma among men in the Aspirin/Folate Polyp Prevention Study.

| Baseline measurement              | Colorectal neoplasia |                       |                          | HRA                   |                          |
|-----------------------------------|----------------------|-----------------------|--------------------------|-----------------------|--------------------------|
|                                   | Total                | No. with endpoint (%) | RR <sup>a</sup> (95% CI) | No. with endpoint (%) | RR <sup>a</sup> (95% CI) |
| Height, m                         |                      |                       |                          |                       |                          |
| <1.70                             | 82                   | 40 (49)               | 1 (Ref)                  | 12 (15)               | 1 (Ref)                  |
| 1.70-1.79                         | 304                  | 132 (43)              | 0.88 (0.68, 1.15)        | 45 (15)               | 0.93 (0.52, 1.67)        |
| ≥1.80                             | 302                  | 147 (49)              | 1.04 (0.81, 1.36)        | 50 (17)               | 1.25 (0.71, 2.21)        |
| Weight, kg                        |                      |                       |                          |                       |                          |
| <80                               | 219                  | 98 (45)               | 1 (Ref)                  | 37 (17)               | 1 (Ref)                  |
| 80-89                             | 231                  | 111 (48)              | 1.01 (0.83, 1.23)        | 32 (14)               | 0.86 (0.56, 1.32)        |
| ≥90                               | 240                  | 111 (46)              | 1.03 (0.84, 1.27)        | 38 (16)               | 1.04 (0.69, 1.56)        |
| BMI, kg/m <sup>2</sup>            |                      |                       |                          |                       |                          |
| <25                               | 166                  | 71 (43)               | 1 (Ref)                  | 22 (13)               | 1 (Ref)                  |
| 25-29                             | 371                  | 174 (47)              | 1.06 (0.86, 1.30)        | 59 (16)               | 1.14 (0.73, 1.77)        |
| ≥30                               | 151                  | 74 (49)               | 1.13 (0.89, 1.44)        | 26 (17)               | 1.36 (0.80, 2.29)        |
| BSA <sup>b</sup> , m <sup>2</sup> |                      |                       |                          |                       |                          |
| <2.00                             | 285                  | 120 (42)              | 1 (Ref)                  | 41 (14)               | 1 (Ref)                  |
| 2.00-2.09                         | 172                  | 91 (53)               | 1.20 (0.98, 1.47)        | 31 (18)               | 1.34 (0.88, 2.06)        |
| ≥2.10                             | 231                  | 108 (47)              | 1.14 (0.94, 1.39)        | 35 (15)               | 1.23 (0.81, 1.87)        |
| FFM <sup>c</sup> , kg             |                      |                       |                          |                       |                          |
| <60                               | 193                  | 87 (45)               | 1 (Ref)                  | 30 (16)               | 1 (Ref)                  |
| 60-64                             | 229                  | 105 (46)              | 0.98 (0.79, 1.21)        | 38 (17)               | 1.14 (0.74, 1.76)        |
| ≥65                               | 266                  | 127 (48)              | 1.08 (0.87, 1.33)        | 39 (15)               | 1.11 (0.72, 1.72)        |
| FM <sup>d</sup> , kg              |                      |                       |                          |                       |                          |
| <20                               | 261                  | 117 (45)              | 1 (Ref)                  | 38 (15)               | 1 (Ref)                  |
| 20-24                             | 193                  | 92 (48)               | 0.98 (0.80, 1.20)        | 31 (16)               | 1.00 (0.65, 1.53)        |
| ≥25                               | 234                  | 110 (47)              | 1.03 (0.85, 1.25)        | 38 (16)               | 1.17 (0.78, 1.76)        |

Abbreviations: BSA, body surface area; BMI, body mass index; CI, confidence interval; FFM, fat-free mass; FM, fat mass; HRA, high-risk adenoma; RR, risk ratio.

Note: Two men were missing height, and thus excluded from the calculations of BMI, BSA, FFM, and FM.

<sup>a</sup> RR adjusted for age, clinical center, aspirin assignment, and folic acid assignment. Endpoints were contrasted to those without colorectal neoplasia.

<sup>b</sup> Calculated using the method of DuBois and DuBois (5).

<sup>c</sup> Calculated using the method of Janmahasatian et al. (6).

<sup>d</sup> Weight minus FFM.

**Supplementary Table 2.** Main effect of body composition measurements for risk of any colorectal neoplasia and high-risk adenoma among women in the Aspirin/Folate Polyp Prevention Study.

| Baseline measurement              | Total | Colorectal neoplasia  |                          | HRA                   |                          |
|-----------------------------------|-------|-----------------------|--------------------------|-----------------------|--------------------------|
|                                   |       | No. with endpoint (%) | RR <sup>a</sup> (95% CI) | No. with endpoint (%) | RR <sup>a</sup> (95% CI) |
| Height, m                         |       |                       |                          |                       |                          |
| <1.60                             | 100   | 37 (37)               | 1 (Ref)                  | 9 (9)                 | 1 (Ref)                  |
| 1.60-1.69                         | 225   | 84 (37)               | 1.11 (0.82, 1.51)        | 20 (9)                | 1.05 (0.49, 2.24)        |
| ≥1.70                             | 69    | 29 (42)               | 1.13 (0.74, 1.72)        | 4 (6)                 | 0.69 (0.21, 2.26)        |
| Weight, kg                        |       |                       |                          |                       |                          |
| <70                               | 209   | 73 (35)               | 1 (Ref)                  | 17 (8)                | 1 (Ref)                  |
| 70-79                             | 88    | 28 (32)               | 0.90 (0.63, 1.30)        | 5 (6)                 | 0.71 (0.28, 1.82)        |
| ≥80                               | 97    | 49 (51)               | 1.38 (1.04, 1.83)        | 11 (11)               | 1.40 (0.70, 2.82)        |
| BMI, kg/m <sup>2</sup>            |       |                       |                          |                       |                          |
| <25                               | 167   | 53 (32)               | 1 (Ref)                  | 10 (6)                | 1 (Ref)                  |
| 25-29                             | 136   | 55 (40)               | 1.22 (0.89, 1.66)        | 15 (11)               | 2.01 (0.94, 4.29)        |
| ≥30                               | 91    | 42 (46)               | 1.35 (0.98, 1.85)        | 8 (9)                 | 1.40 (0.57, 3.47)        |
| BSA <sup>b</sup> , m <sup>2</sup> |       |                       |                          |                       |                          |
| <1.70                             | 155   | 56 (36)               | 1 (Ref)                  | 14 (9)                | 1 (Ref)                  |
| 1.70-1.79                         | 87    | 28 (32)               | 0.98 (0.68, 1.41)        | 4 (5)                 | 0.55 (0.17, 1.74)        |
| ≥1.80                             | 152   | 266 (43)              | 1.17 (0.88, 1.57)        | 15 (10)               | 1.09 (0.56, 2.14)        |
| FFM <sup>c</sup> , kg             |       |                       |                          |                       |                          |
| <40                               | 119   | 42 (35)               | 1 (Ref)                  | 8 (7)                 | 1 (Ref)                  |
| 40-44                             | 150   | 50 (33)               | 0.99 (0.71, 1.38)        | 13 (9)                | 1.35 (0.57, 3.19)        |
| ≥45                               | 125   | 58 (46)               | 1.25 (0.91, 1.72)        | 12 (10)               | 1.39 (0.58, 3.13)        |
| FM <sup>d</sup> , kg              |       |                       |                          |                       |                          |
| <30                               | 249   | 85 (34)               | 1 (Ref)                  | 19 (8)                | 1 (Ref)                  |
| 30-34                             | 64    | 25 (39)               | 1.18 (0.82, 1.70)        | 7 (11)                | 1.59 (0.68, 3.71)        |
| ≥35                               | 81    | 40 (49)               | 1.36 (1.01, 1.81)        | 7 (9)                 | 1.15 (0.51, 2.55)        |

Abbreviations: BSA, body surface area; BMI, body mass index; CI, confidence interval; FFM, fat-free mass; FM, fat mass; HRA, high-risk adenoma; RR, risk ratio.

<sup>a</sup> RR adjusted for age, clinical center, aspirin assignment, and folic acid assignment. Endpoints were contrasted to those without colorectal neoplasia.

<sup>b</sup> Calculated using the method of DuBois and DuBois (5).

<sup>c</sup> Calculated using the method of Janmahasatian et al. (6).

<sup>d</sup> Weight minus FFM.

**Supplementary Table 3.** Aspirin treatment effect for risk of any colorectal neoplasia and high-risk adenoma according to body composition measurements among men in the Aspirin/Folate Polyp Prevention Study.

| Baseline measurement              | Colorectal neoplasia                                   |                                                         | HRA                                                    |                                                         |
|-----------------------------------|--------------------------------------------------------|---------------------------------------------------------|--------------------------------------------------------|---------------------------------------------------------|
|                                   | 81 mg/d aspirin vs placebo<br>RR <sup>a</sup> (95% CI) | 325 mg/d aspirin vs placebo<br>RR <sup>a</sup> (95% CI) | 81 mg/d aspirin vs placebo<br>RR <sup>a</sup> (95% CI) | 325 mg/d aspirin vs placebo<br>RR <sup>a</sup> (95% CI) |
| Height, m                         |                                                        |                                                         |                                                        |                                                         |
| <1.70                             | 0.60 (0.28, 1.24)                                      | 1.39 (0.85, 2.28)                                       | 0.68 (0.18, 2.63)                                      | 1.73 (0.53, 5.60)                                       |
| 1.70-1.79                         | 0.89 (0.63, 1.26)                                      | 1.09 (0.80, 1.49)                                       | 0.55 (0.24, 1.24)                                      | 1.12 (0.60, 2.09)                                       |
| ≥1.80                             | 0.72 (0.55, 0.95)                                      | 0.83 (0.63, 1.08)                                       | 0.54 (0.30, 0.99)                                      | 0.75 (0.43, 1.32)                                       |
| P-interaction                     | 0.52                                                   | 0.15                                                    | 0.95                                                   | 0.39                                                    |
| Weight, kg                        |                                                        |                                                         |                                                        |                                                         |
| <80                               | 0.77 (0.51, 1.15)                                      | 1.22 (0.87, 1.71)                                       | 0.48 (0.20, 1.16)                                      | 1.37 (0.74, 2.53)                                       |
| 80-89                             | 0.88 (0.62, 1.23)                                      | 0.94 (0.69, 1.29)                                       | 0.91 (0.40, 2.07)                                      | 1.08 (0.50, 2.34)                                       |
| ≥90                               | 0.69 (0.49, 0.97)                                      | 0.84 (0.61, 1.15)                                       | 0.45 (0.22, 0.93)                                      | 0.65 (0.33, 1.28)                                       |
| P-interaction                     | 0.61                                                   | 0.27                                                    | 0.40                                                   | 0.27                                                    |
| BMI, kg/m <sup>2</sup>            |                                                        |                                                         |                                                        |                                                         |
| <25                               | 0.82 (0.52, 1.28)                                      | 0.99 (0.67, 1.48)                                       | 0.72 (0.26, 1.99)                                      | 1.18 (0.51, 2.76)                                       |
| 25-29                             | 0.82 (0.62, 1.08)                                      | 0.97 (0.75, 1.25)                                       | 0.63 (0.34, 1.19)                                      | 1.11 (0.65, 1.91)                                       |
| ≥30                               | 0.58 (0.37, 0.92)                                      | 0.95 (0.67, 1.35)                                       | 0.36 (0.15, 0.86)                                      | 0.56 (0.25, 1.28)                                       |
| P-interaction                     | 0.43                                                   | 0.99                                                    | 0.51                                                   | 0.35                                                    |
| BSA <sup>b</sup> , m <sup>2</sup> |                                                        |                                                         |                                                        |                                                         |
| <2.00                             | 0.83 (0.57, 1.22)                                      | 1.30 (0.94, 1.79)                                       | 0.59 (0.25, 1.41)                                      | 1.65 (0.86, 3.14)                                       |
| 2.00-2.09                         | 0.80 (0.57, 1.13)                                      | 0.82 (0.59, 1.14)                                       | 0.77 (0.35, 1.69)                                      | 0.87 (0.42, 1.81)                                       |
| ≥2.10                             | 0.66 (0.47, 0.94)                                      | 0.82 (0.59, 1.12)                                       | 0.40 (0.19, 0.84)                                      | 0.51 (0.24, 1.08)                                       |
| P-interaction                     | 0.63                                                   | 0.08                                                    | 0.49                                                   | 0.06                                                    |
| FFM <sup>c</sup> , kg             |                                                        |                                                         |                                                        |                                                         |
| <60                               | 0.87 (0.56, 1.34)                                      | 1.28 (0.88, 1.86)                                       | 0.64 (0.23, 1.80)                                      | 1.86 (0.87, 3.96)                                       |
| 60-64                             | 0.81 (0.56, 1.18)                                      | 1.02 (0.74, 1.41)                                       | 0.73 (0.35, 1.55)                                      | 1.09 (0.56, 2.13)                                       |
| ≥65                               | 0.68 (0.50, 0.92)                                      | 0.79 (0.59, 1.06)                                       | 0.41 (0.21, 0.83)                                      | 0.49 (0.24, 1.00)                                       |
| P-interaction                     | 0.59                                                   | 0.13                                                    | 0.53                                                   | 0.04                                                    |
| FM <sup>d</sup> , kg              |                                                        |                                                         |                                                        |                                                         |
| <20                               | 0.83 (0.59, 1.18)                                      | 1.04 (0.76, 1.42)                                       | 0.58 (0.24, 1.36)                                      | 1.39 (0.74, 2.61)                                       |
| 20-24                             | 0.82 (0.56, 1.20)                                      | 0.96 (0.68, 1.37)                                       | 0.68 (0.30, 1.51)                                      | 0.75 (0.34, 1.64)                                       |
| ≥25                               | 0.65 (0.46, 0.93)                                      | 0.92 (0.67, 1.24)                                       | 0.48 (0.23, 0.98)                                      | 0.78 (0.40, 1.51)                                       |
| P-interaction                     | 0.57                                                   | 0.84                                                    | 0.81                                                   | 0.35                                                    |

Abbreviations: BSA, body surface area; BMI, body mass index; CI, confidence interval; FFM, fat-free mass; FM, fat mass; HRA, high-risk adenoma; RR, risk ratio.

Note: Two men were missing height, and thus excluded from the calculations of BMI, BSA, FFM, and FM.

<sup>a</sup> RR from interaction between body composition measurement and aspirin assignment, adjusted for age, clinical center, and folic acid assignment. Endpoints were contrasted to those without colorectal neoplasia.

<sup>b</sup> Calculated using the method of DuBois and DuBois (5).

<sup>c</sup> Calculated using the method of Janmahasatian et al. (6).

<sup>d</sup> Weight minus FFM.

**Supplementary Table 4.** Aspirin treatment effect for risk of any colorectal neoplasia and high-risk adenoma according to body composition measurements among women in the Aspirin/Folate Polyp Prevention Study.

| Baseline measurement              | Colorectal neoplasia                                   |                                                         | HRA                                                    |                                                         |
|-----------------------------------|--------------------------------------------------------|---------------------------------------------------------|--------------------------------------------------------|---------------------------------------------------------|
|                                   | 81 mg/d aspirin vs placebo<br>RR <sup>a</sup> (95% CI) | 325 mg/d aspirin vs placebo<br>RR <sup>a</sup> (95% CI) | 81 mg/d aspirin vs placebo<br>RR <sup>a</sup> (95% CI) | 325 mg/d aspirin vs placebo<br>RR <sup>a</sup> (95% CI) |
| Height, m                         |                                                        |                                                         |                                                        |                                                         |
| <1.60                             | 0.77 (0.40, 1.49)                                      | 0.87 (0.47, 1.60)                                       | —                                                      | —                                                       |
| 1.60-1.69                         | 0.71 (0.46, 1.09)                                      | 0.91 (0.62, 1.34)                                       | —                                                      | —                                                       |
| ≥1.70                             | 1.98 (0.77, 5.11)                                      | 1.47 (0.56, 3.87)                                       | —                                                      | —                                                       |
| P-interaction                     | 0.15                                                   | 0.63                                                    | —                                                      | —                                                       |
| Weight, kg                        |                                                        |                                                         |                                                        |                                                         |
| <70                               | 0.86 (0.54, 1.37)                                      | 0.89 (0.57, 1.41)                                       | 0.61 (0.18, 2.03)                                      | 0.76 (0.25, 2.36)                                       |
| 70-79                             | 1.07 (0.50, 2.31)                                      | 1.01 (0.46, 2.19)                                       | 0.43 (0.05, 3.92)                                      | 0.55 (0.07, 4.71)                                       |
| ≥80                               | 0.77 (0.44, 1.37)                                      | 1.00 (0.62, 1.60)                                       | 0.18 (0.02, 1.35)                                      | 0.32 (0.07, 1.45)                                       |
| P-interaction                     | 0.80                                                   | 0.94                                                    | 0.60                                                   | 0.67                                                    |
| BMI, kg/m <sup>2</sup>            |                                                        |                                                         |                                                        |                                                         |
| <25                               | 0.77 (0.44, 1.38)                                      | 1.06 (0.63, 1.76)                                       | 0.86 (0.18, 4.10)                                      | 1.05 (0.23, 4.83)                                       |
| 25-29                             | 0.89 (0.53, 1.51)                                      | 0.87 (0.51, 1.48)                                       | 0.27 (0.06, 1.15)                                      | 0.65 (0.21, 2.00)                                       |
| ≥30                               | 1.01 (0.58, 1.76)                                      | 0.93 (0.55, 1.55)                                       | 0.34 (0.05, 2.38)                                      | 0.20 (0.02, 1.56)                                       |
| P-interaction                     | 0.81                                                   | 0.87                                                    | 0.53                                                   | 0.44                                                    |
| BSA <sup>b</sup> , m <sup>2</sup> |                                                        |                                                         |                                                        |                                                         |
| <1.70                             | 0.75 (0.44, 1.29)                                      | 0.91 (0.56, 1.49)                                       | —                                                      | —                                                       |
| 1.70-1.79                         | 0.86 (0.39, 1.92)                                      | 0.93 (0.43, 2.02)                                       | —                                                      | —                                                       |
| ≥1.80                             | 1.01 (0.63, 1.61)                                      | 1.01 (0.63, 1.62)                                       | —                                                      | —                                                       |
| P-interaction                     | 0.72                                                   | 0.77                                                    | —                                                      | —                                                       |
| FFM <sup>c</sup> , kg             |                                                        |                                                         |                                                        |                                                         |
| <40                               | 0.94 (0.50, 1.77)                                      | 1.09 (0.61, 1.93)                                       | —                                                      | —                                                       |
| 40-44                             | 0.74 (0.43, 1.28)                                      | 0.80 (0.45, 1.41)                                       | —                                                      | —                                                       |
| ≥45                               | 1.00 (0.59, 1.67)                                      | 1.00 (0.61, 1.62)                                       | —                                                      | —                                                       |
| P-interaction                     | 0.73                                                   | 0.74                                                    | —                                                      | —                                                       |
| FM <sup>d</sup> , kg              |                                                        |                                                         |                                                        |                                                         |
| <30                               | 0.86 (0.55, 1.33)                                      | 0.94 (0.62, 1.44)                                       | —                                                      | —                                                       |
| 30-34                             | 1.20 (0.56, 2.57)                                      | 1.34 (0.64, 2.81)                                       | —                                                      | —                                                       |
| ≥35                               | 0.74 (0.41, 1.33)                                      | 0.79 (0.46, 1.37)                                       | —                                                      | —                                                       |
| P-interaction                     | 0.61                                                   | 0.54                                                    | —                                                      | —                                                       |

Abbreviations: BSA, body surface area; BMI, body mass index; CI, confidence interval; FFM, fat-free mass; FM, fat mass; HRA, high-risk adenoma; RR, risk ratio.

Note: Results not reported when the endpoint occurred in fewer than 5 participants for a level of the body composition variable or were not estimable by aspirin dose.

<sup>a</sup> RR from interaction between body composition measurement and aspirin assignment, adjusted for age, clinical center, and folic acid assignment. Endpoints were contrasted to those without colorectal neoplasia.

<sup>b</sup> Calculated using the method of DuBois and DuBois (5).

<sup>c</sup> Calculated using the method of Janmahasatian et al. (6).

<sup>d</sup> Weight minus FFM.
